# Supplementary material for: Mechanically and electrically durable, stretchable electronic textiles for robust wearable electronics
Source: Royal Society of Chemistry journal article supplement (doi:10.1039/d1ra03392a), 2021-01-01
Supplement: d1ra03392a1.pdf [file d1ra03392a1.pdf]

## **Mechanically and electrically durable, stretchable electronic textile for robust wearable electronics**

Sun Hong Kim<sup>a,1</sup>, Yewon Kim<sup>b,1</sup>, Heewon Choi<sup>b</sup>, Juhyung Park<sup>a</sup>, Jeong Han Song<sup>a</sup>, Hyoung  
Won Baac<sup>b</sup>, Mikyung Shin<sup>e,f</sup>, Jeonghun Kwak<sup>a\*</sup>, Donghee Son<sup>b,c,d\*</sup>

<sup>a</sup>*Department of Electrical and Computer Engineering, Inter-University Semiconductor Research  
Center, Seoul National University, Seoul 08826, Republic of Korea.*

<sup>b</sup>*Department of Electrical and Computer Engineering, Sungkyunkwan University, Suwon 16419,  
Republic of Korea.*

<sup>c</sup>*Center for Neuroscience Imaging Research, Institute for Basic Science (IBS), Sungkyunkwan  
University (SKKU), Suwon 16419, Republic of Korea,*

<sup>d</sup>*Department of Superintelligence Engineering, Sungkyunkwan University (SKKU), Suwon 16419,  
Republic of Korea.*

<sup>e</sup>*Department of Biomedical Engineering, Sungkyunkwan University (SKKU), Seobu-ro 2066, Jangan-  
gu, Suwon 16419, Gyeonggi-do, Korea*

<sup>f</sup>*Department of Intelligent Precision Healthcare Convergence, Sungkyunkwan University (SKKU),  
Seobu-ro 2066, Jangan-gu, Suwon 16419, Gyeonggi-do, Korea*

<sup>1</sup>These authors contributed equally to this work.

\*Corresponding author: daniel3600@g.skku.edu (D.Son), jkwak@snu.ac.kr (J.Kwak)

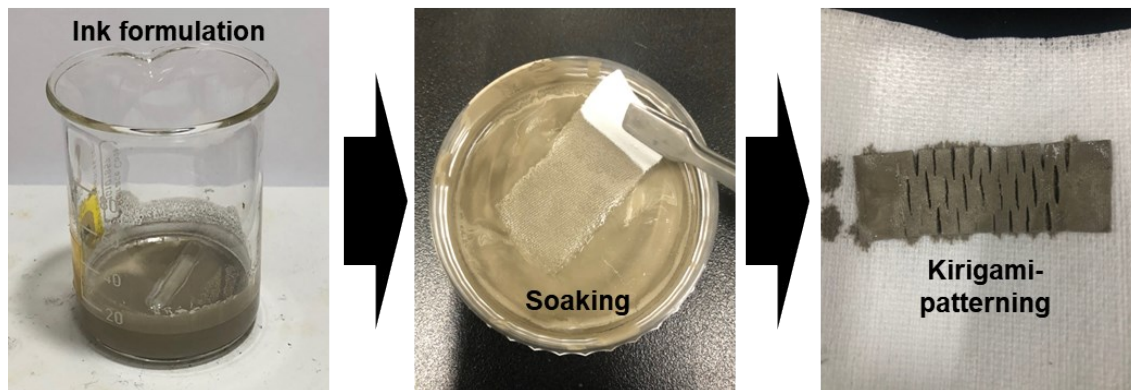

**Figure S1. Fabrication process for the kirigami-inspired MED-ET.** Ag flakes and the synthesized self-healing polymer were mixed in 4-methyl-2-pentanone for 1 h. Subsequently, the polyurethane fabric was soaked in ink. After drying for 1 h, we patterned the fabric in a kirigami shape.

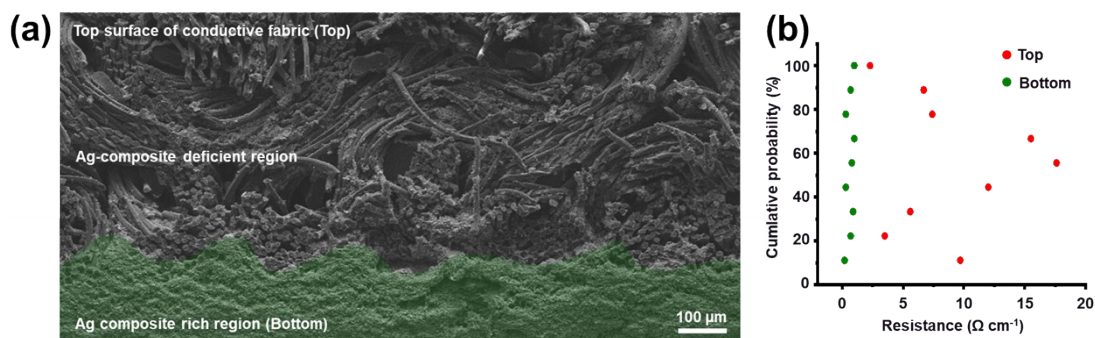

**Figure S2. Ag composite rich region of conductive fabric.** (a) Cross-sectional SEM image of the Ag composite rich region which formed by sinking of Ag ink induced by gravity. (b) The resistance variation of both side of surfaces of conductive fabric. The Ag composite rich region (Bottom) shows good uniformity compared to top surface of conductive fabric

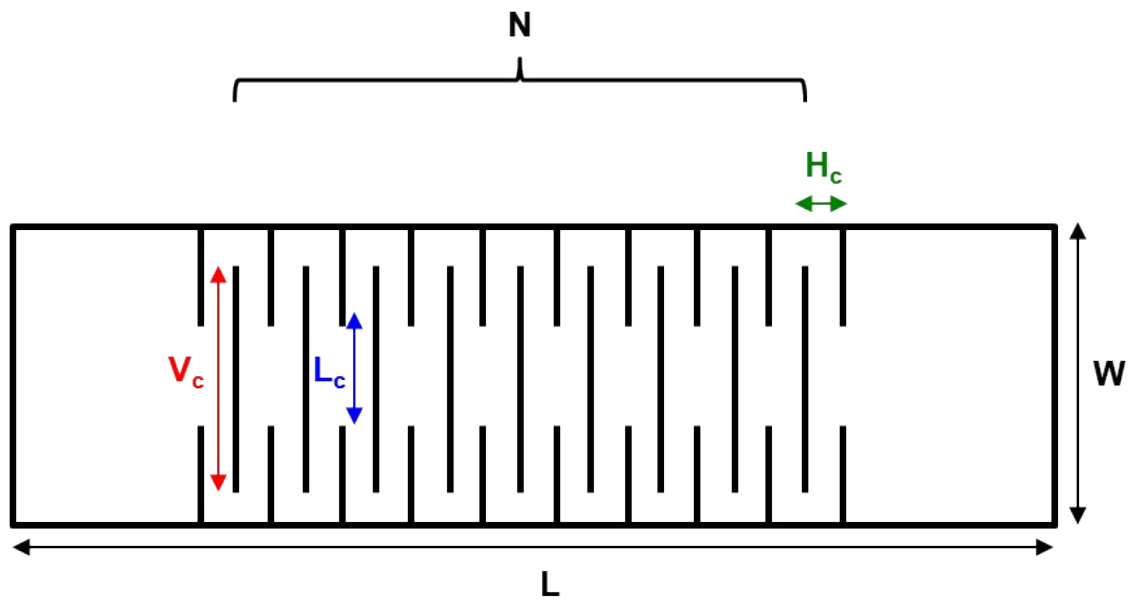

**Figure S3. Schematic illustration showing size of kirigami-inspired pattern.** The kirigami-inspired pattern consists of  $W$  (width),  $L$  (length),  $V_c$  (vertical cut-spacing),  $H_c$  (horizontal cut-spacing),  $L_c$  (center cut length) and  $N$  (number of cuts)

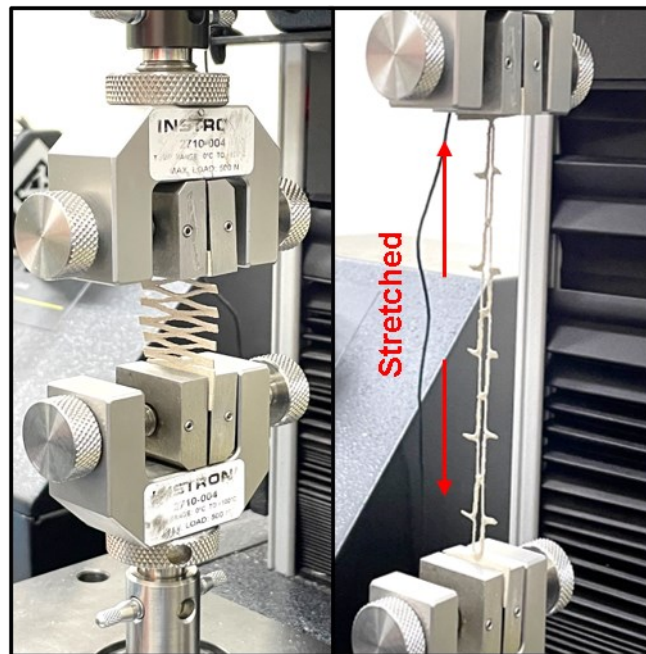

**Figure S4. Strain–stress test of conductive fabrics.** Photographs of the MED-ET before stretching (left) and showing high stretchability at 400% stretching (right) in an Instron machine.

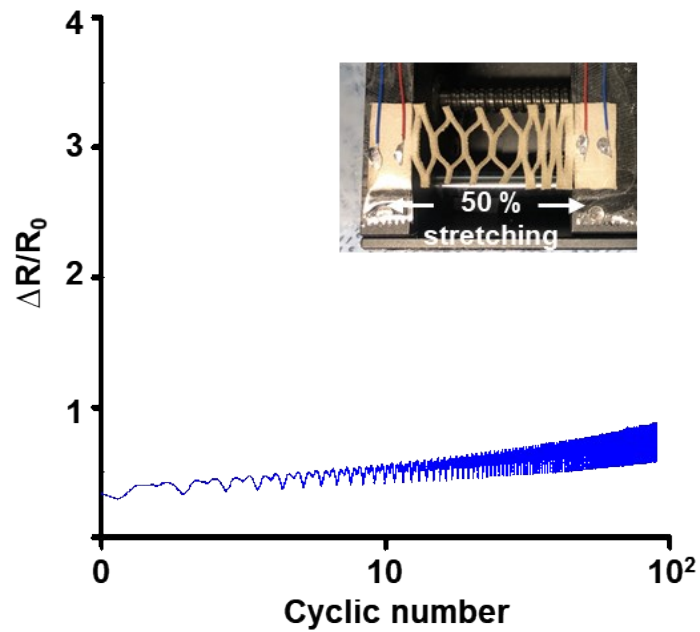

**Figure S5. Cyclic test of the kirigami-patterned conductive fabric at 50% strain** To verify electrical and mechanical stability of the kirigami-patterned conductive fabric under more harsh condition, the cyclic test was performed at 50 % strain

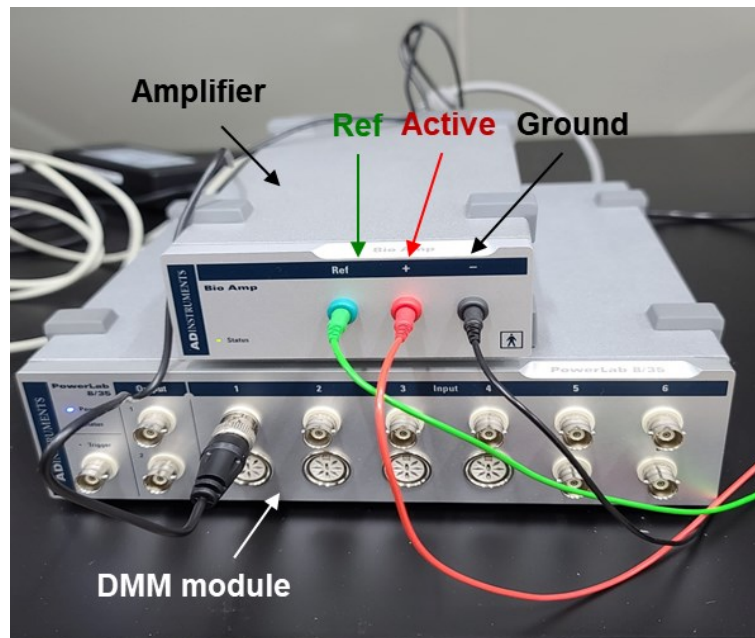

**Figure S6. Setup for EMG measurements.** Data acquisition device (DAQ) module and amplifier for EMG demonstration.
